# Supplementary material
Source: PubMed Central journal article supplement (PMC2148280)

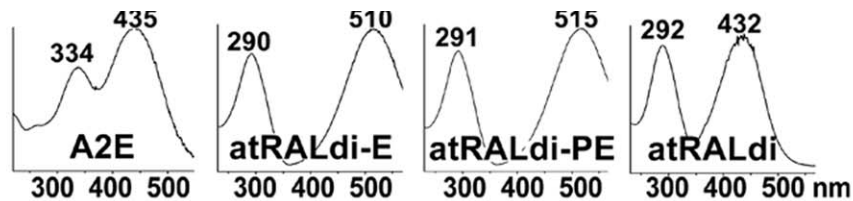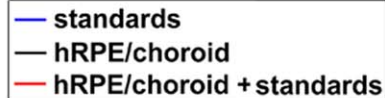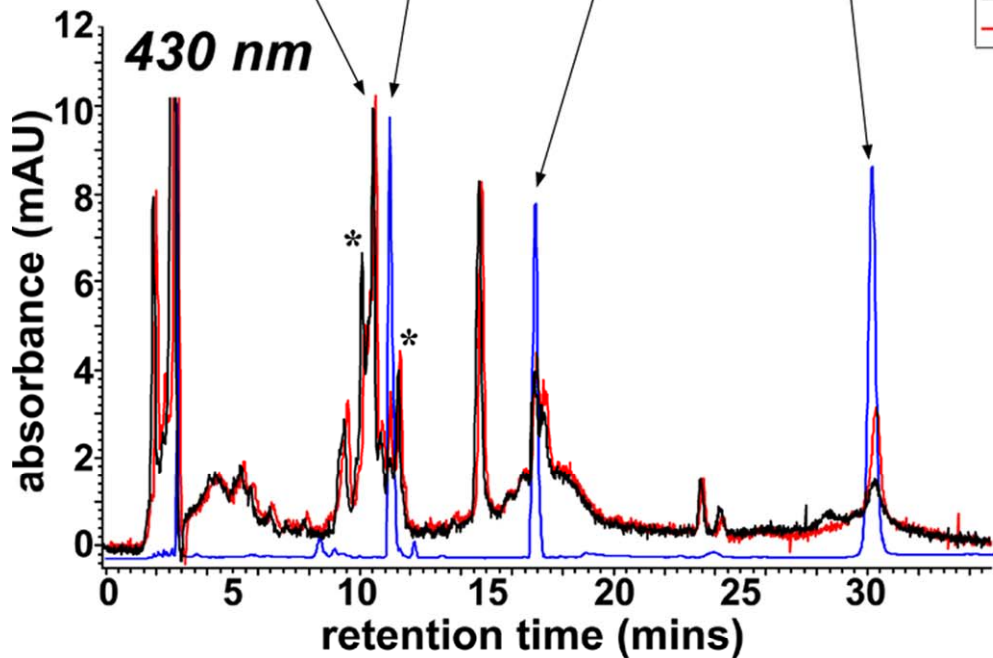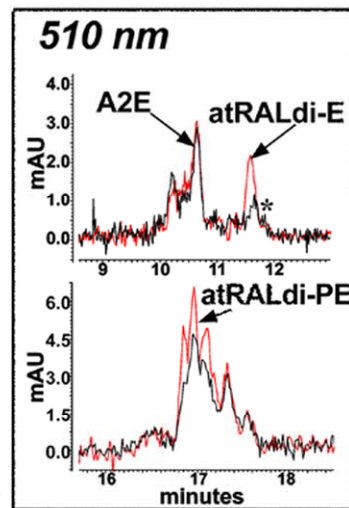

Supplement: pnas_0708714104_1.pdf [file pnas_0708714104_1.pdf]

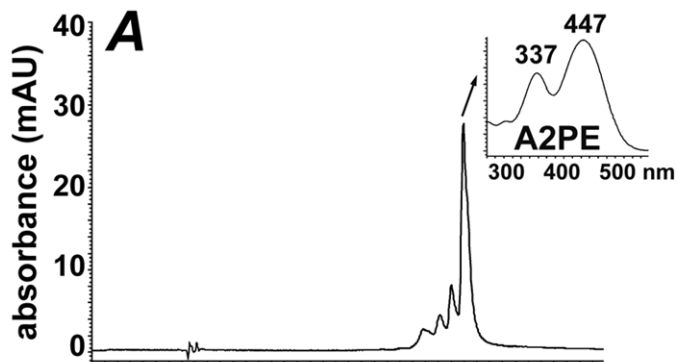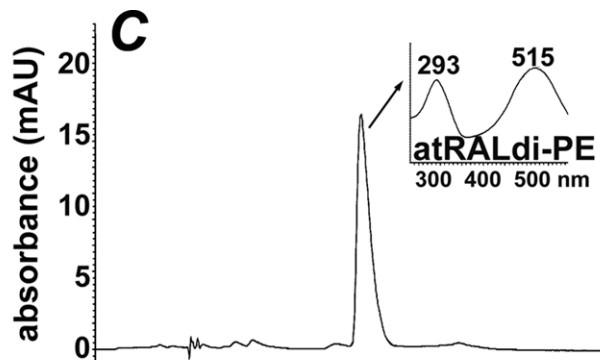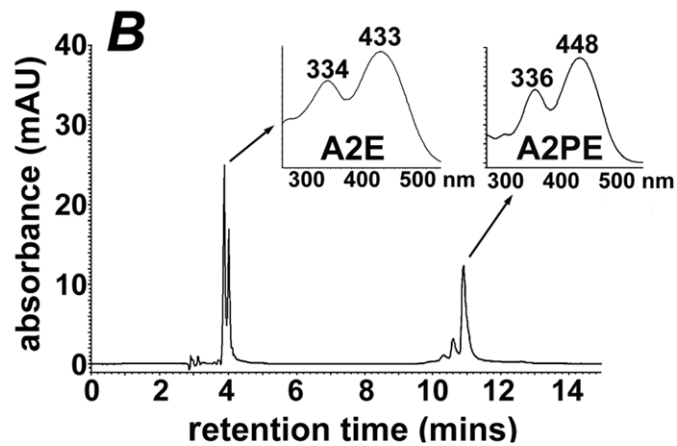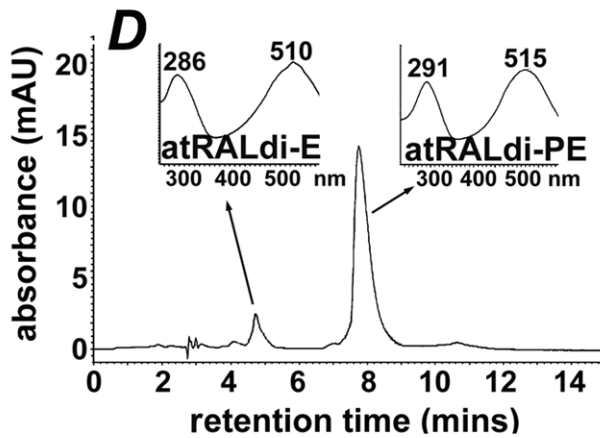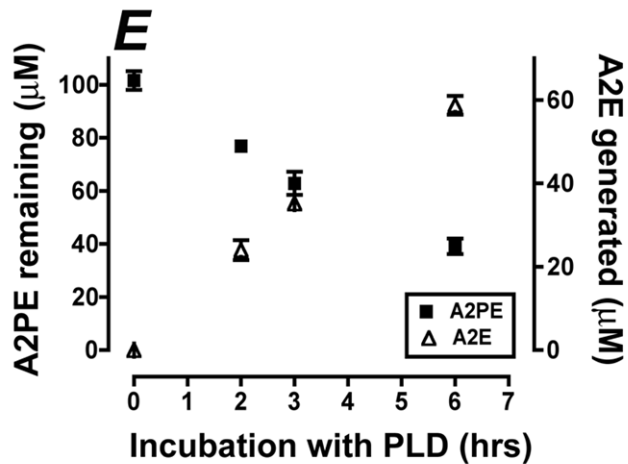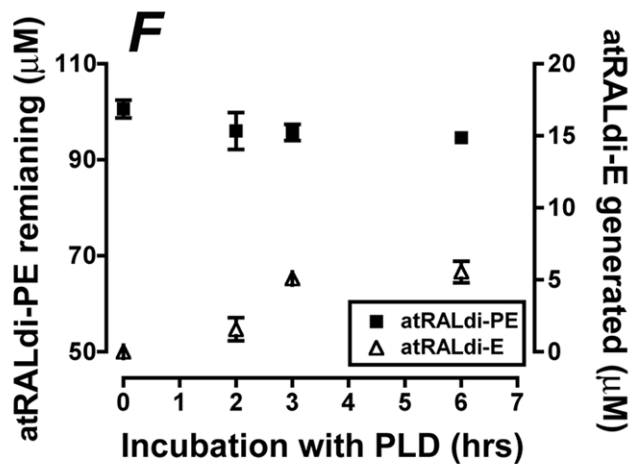

Supplement: pnas_0708714104_2.pdf [file pnas_0708714104_2.pdf]

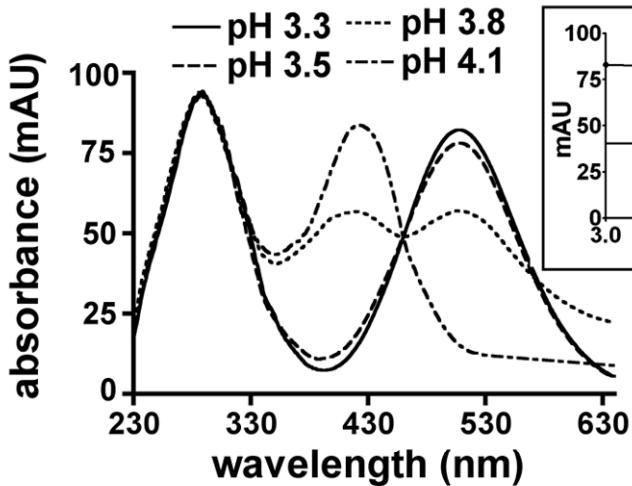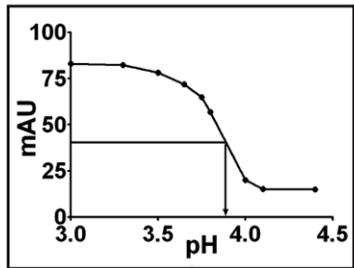

Supplement: pnas_0708714104_3.pdf [file pnas_0708714104_3.pdf]

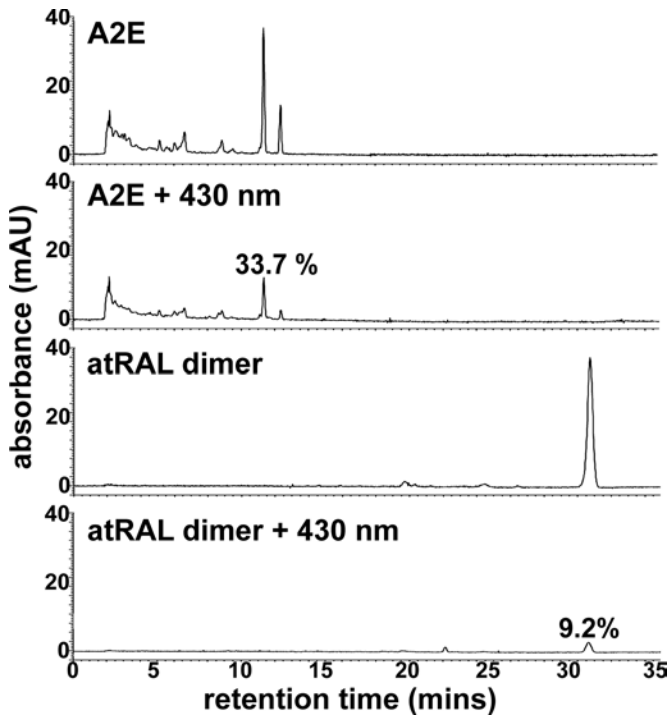

Supplement: pnas_0708714104_4.pdf [file pnas_0708714104_4.pdf]

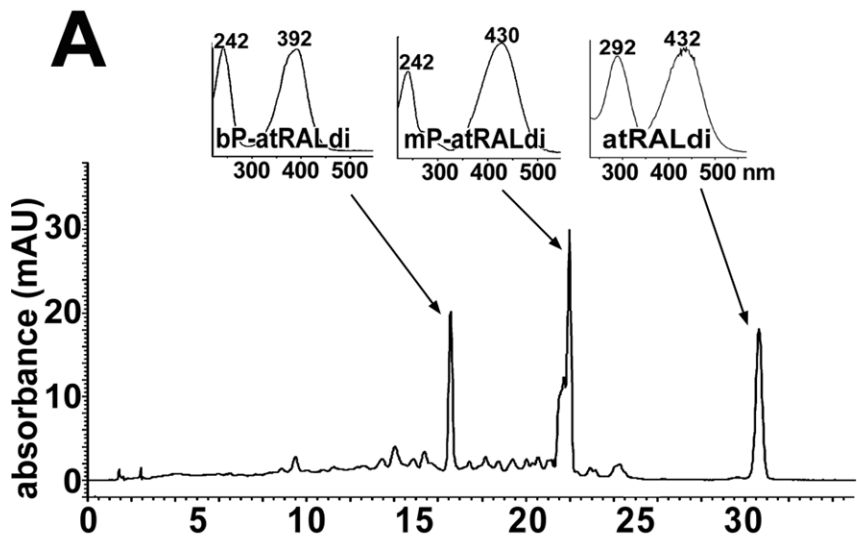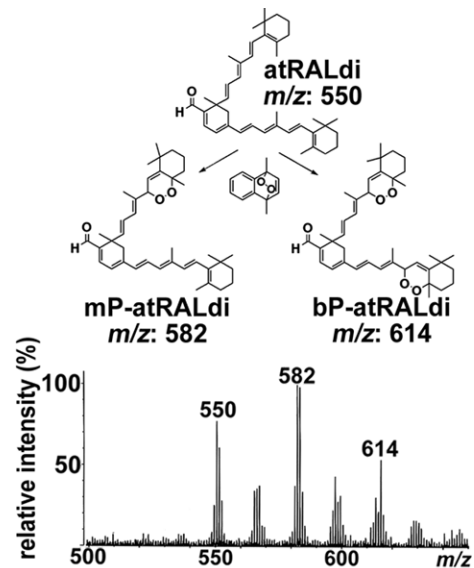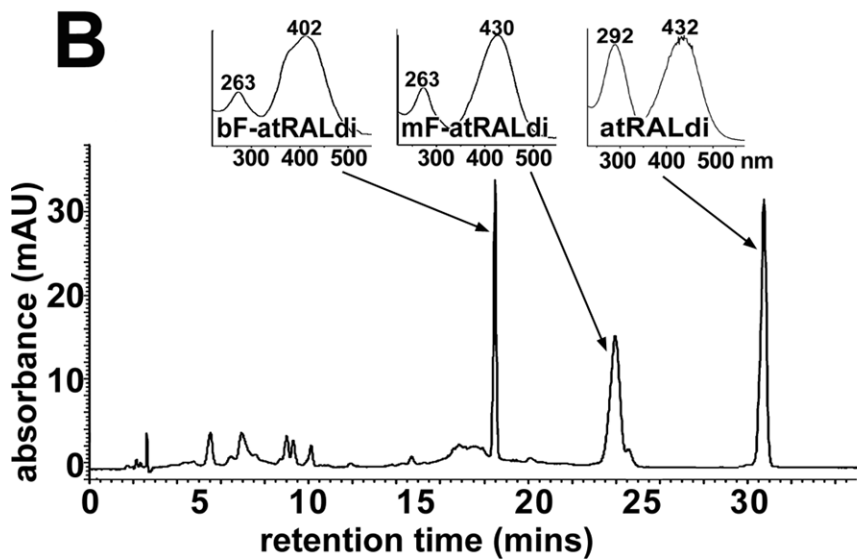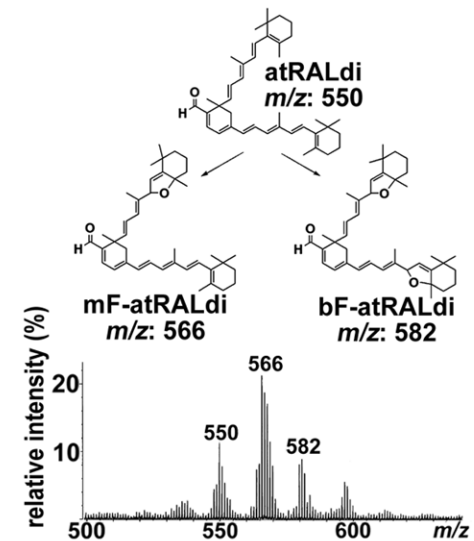

Supplement: pnas_0708714104_5.pdf [file pnas_0708714104_5.pdf]
